# Supplementary material for: Energy stress-induced lncRNA GIRGL modulates glucose metabolism reprogramming through upregulating MCT4 by interacting with YBX1 in lung adenocarcinoma
Source: Research Square preprint supplement (doi:10.21203/rs.3.rs-6423847/v1), 2025-05-14
Supplement: Supplementary file 1 [file 629212def702a1c9d7bef8d8.xlsx]

## Sheet: Sheet1
Table S1:Gene clusters for Gene_Ontology enrichment
Gene Symbol	Gene ID	PCC
CTA-293F17.1	ENSG00000271133.5	0.55
MACC1	ENSG00000183742.12	0.54
NUPL2	ENSG00000136243.16	0.48
ARL4A	ENSG00000122644.12	0.46
ZDHHC4	ENSG00000136247.14	0.46
RGMB-AS1	ENSG00000246763.6	0.42
TIGD4	ENSG00000169989.2	0.42
C1QTNF3-AMACR	ENSG00000273294.1	0.42
GLRB	ENSG00000109738.10	0.41
MTNR1B	ENSG00000134640.2	0.41
CDCA7L	ENSG00000164649.19	0.4
PAQR4	ENSG00000162073.13	0.4
LINC01569	ENSG00000262468.5	0.4
CDKAL1	ENSG00000145996.11	0.39
H2AFV	ENSG00000105968.18	0.39
ACTG1P23	ENSG00000230362.1	0.39
CTB-119C2.1	ENSG00000273237.1	0.39
RP9	ENSG00000164610.8	0.39
ICA1	ENSG00000003147.17	0.39
PHF14	ENSG00000106443.14	0.39
FTSJ2	ENSG00000122687.17	0.39
LINC01346	ENSG00000233304.5	0.39
APITD1	ENSG00000175279.21	0.38
RP11-460B17.3	ENSG00000254530.1	0.38
SCN2A	ENSG00000136531.13	0.38
FAM221A	ENSG00000188732.10	0.38
GUSB	ENSG00000169919.16	0.38
C1QTNF3	ENSG00000082196.20	0.37
C12orf42	ENSG00000179088.14	0.37
WDR25	ENSG00000176473.13	0.37
AC091729.9	ENSG00000229043.2	0.37
CITF22-92A6.1	ENSG00000273145.1	0.37
TMED4	ENSG00000158604.14	0.37
RP5-1159O4.1	ENSG00000272894.5	0.37
PCDHA1	ENSG00000204970.9	0.37
ENPP3	ENSG00000154269.14	0.36
WWOX	ENSG00000186153.16	0.36
PIK3CD-AS2	ENSG00000231789.2	0.36
SH3BGR	ENSG00000185437.13	0.36
ZSWIM5	ENSG00000162415.6	0.36
RPS2P32	ENSG00000232818.2	0.36
PTF1A	ENSG00000168267.5	0.36
CTA-150C2.13	ENSG00000235209.1	0.36
SNX13	ENSG00000071189.21	0.36
SCG3	ENSG00000104112.8	0.36
CH17-340M24.3	ENSG00000197180.2	0.36
KLHDC9	ENSG00000162755.13	0.36
RP3-388M5.9	ENSG00000261251.1	0.35
RP11-36N20.1	ENSG00000226876.2	0.35
RP11-108M9.4	ENSG00000238142.1	0.35
RP11-337C18.10	ENSG00000273071.1	0.35
DPY19L1P1	ENSG00000229358.3	0.35
RP11-223A3.1	ENSG00000227527.2	0.35
CTB-178M22.2	ENSG00000253978.1	0.35
PHYHIPL	ENSG00000165443.11	0.35
GHET1	ENSG00000281189.1	0.35
ELMO1	ENSG00000155849.15	0.35
RP5-1025A1.3	ENSG00000275358.1	0.35
RP5-1159O4.2	ENSG00000272732.1	0.35
RP11-264L1.2	ENSG00000279129.1	0.35
LINC00853	ENSG00000224805.2	0.35
FAM104B	ENSG00000182518.13	0.35
ANKMY2	ENSG00000106524.8	0.35
NPC1L1	ENSG00000015520.14	0.35
TCEB3-AS1	ENSG00000236810.5	0.34
MALSU1	ENSG00000156928.4	0.34
RP4-533D7.5	ENSG00000227857.2	0.34
LINC00581	ENSG00000280989.1	0.34
AC144450.1	ENSG00000228613.1	0.34
RN7SL578P	ENSG00000239228.3	0.34
RP11-10F11.3	ENSG00000277174.1	0.34
ARL2BPP1	ENSG00000265934.1	0.34
RP11-56O18.1	ENSG00000270815.1	0.34
Metazoa_SRP	ENSG00000277473.1	0.34
RP11-459D20.1	ENSG00000233575.2	0.34
IGHVII-22-1	ENSG00000253345.1	0.34
Metazoa_SRP	ENSG00000273986.1	0.34
RNA5SP146	ENSG00000222675.1	0.34
RN7SL97P	ENSG00000242216.3	0.34
AL603650.4	ENSG00000266060.1	0.34
RP4-700A9.1	ENSG00000231622.1	0.34
CCT6B	ENSG00000132141.13	0.34
RP11-76I14.1	ENSG00000256637.6	0.34
RP11-620J15.1	ENSG00000257953.1	0.34
P2RX6	ENSG00000099957.16	0.34
RP5-1096J16.1	ENSG00000243810.1	0.34
ITGB8	ENSG00000105855.9	0.34
LA16c-444G7.2	ENSG00000260420.2	0.34
NPAS4	ENSG00000174576.8	0.34
PLRG1	ENSG00000171566.11	0.34
RP11-792A8.4	ENSG00000272831.1	0.34
AC009506.1	ENSG00000224152.1	0.34
RP11-685A21.1	ENSG00000267215.1	0.34
AMACR	ENSG00000242110.7	0.34
LINC00683	ENSG00000266256.1	0.34
LNX1	ENSG00000072201.13	0.34
SCG2	ENSG00000171951.4	0.34
FHDC1	ENSG00000137460.8	0.34
SLC29A4	ENSG00000164638.10	0.34
WLS	ENSG00000116729.13	0.33
RP11-108E14.1	ENSG00000253300.1	0.33
RP11-73G16.1	ENSG00000251249.1	0.33
GS1-166A23.2	ENSG00000272361.2	0.33
DPY19L2P3	ENSG00000227855.3	0.33
C7orf26	ENSG00000146576.12	0.33
CH17-353B19.1	ENSG00000276509.1	0.33
SEPT7-AS1	ENSG00000228878.7	0.33
GET4	ENSG00000239857.6	0.33
COA1	ENSG00000106603.17	0.33
AC068535.3	ENSG00000225765.1	0.33
NTHL1	ENSG00000065057.7	0.33
RP11-140K17.3	ENSG00000272288.5	0.33
RP1-65J11.1	ENSG00000223382.3	0.33
UBE2D4	ENSG00000078967.12	0.33
RP11-108M9.5	ENSG00000235241.1	0.33
SERGEF	ENSG00000129158.10	0.33
RP11-241G9.3	ENSG00000249295.1	0.33
AC007682.1	ENSG00000231918.1	0.33
GS1-124K5.4	ENSG00000237310.1	0.33
EIF2AK1	ENSG00000086232.12	0.33
CCDC126	ENSG00000169193.11	0.33
COLEC10	ENSG00000184374.2	0.33
IQCC	ENSG00000160051.11	0.33
RP1-43E13.2	ENSG00000230424.1	0.33
DNALI1	ENSG00000163879.10	0.33
TMEM106B	ENSG00000106460.18	0.33
AC007679.1	ENSG00000213739.3	0.33
RP5-1024G6.5	ENSG00000226754.1	0.33
GRIA2	ENSG00000120251.18	0.33
SERTAD4-AS1	ENSG00000203706.8	0.33
CHN2	ENSG00000106069.20	0.33
RIMKLA	ENSG00000177181.14	0.33
RP11-307C12.13	ENSG00000270361.1	0.32
MEAF6	ENSG00000163875.15	0.32
RP11-624D11.2	ENSG00000254532.1	0.32
AC099342.1	ENSG00000226097.5	0.32
RP11-323I1.1	ENSG00000228255.1	0.32
BBS9	ENSG00000122507.20	0.32
GPC5-AS1	ENSG00000235984.5	0.32
ZNF12	ENSG00000164631.18	0.32
AC068535.2	ENSG00000227157.1	0.32
PAGR1	ENSG00000280789.1	0.32
RUNDC3A	ENSG00000108309.12	0.32
BRAT1	ENSG00000106009.15	0.32
FLJ37453	ENSG00000179743.4	0.32
XXbac-B33L19.6	ENSG00000277017.1	0.32
AC011995.3	ENSG00000228391.1	0.32
RP11-467N20.6	ENSG00000277505.1	0.32
RP11-361A23.2	ENSG00000188646.6	0.32
RP11-448N11.2	ENSG00000217067.2	0.32
AC096554.1	ENSG00000228968.1	0.32
RP1-27C22.1	ENSG00000275194.1	0.32
LINC00643	ENSG00000186369.9	0.32
SP4	ENSG00000105866.13	0.32
RP11-166P13.3	ENSG00000263004.1	0.32
TRPC3	ENSG00000138741.10	0.32
CTBP2P8	ENSG00000234383.1	0.32
CYSLTR1	ENSG00000173198.5	0.32
HMGN5	ENSG00000198157.10	0.32
RP11-55K22.2	ENSG00000213109.4	0.32
PAXBP1-AS1	ENSG00000238197.5	0.32
FERD3L	ENSG00000146618.3	0.32
OR51E2	ENSG00000167332.7	0.32
HHAT	ENSG00000054392.12	0.32
NUDT6	ENSG00000170917.13	0.32
LRAT	ENSG00000121207.11	0.32
TAC1	ENSG00000006128.11	0.32
LINC00339	ENSG00000218510.5	0.32
AC003986.5	ENSG00000229533.1	0.32
RP11-347C12.10	ENSG00000260219.2	0.32
RP11-638I8.1	ENSG00000272556.1	0.32
AC078941.1	ENSG00000236780.5	0.32
HCRTR2	ENSG00000137252.9	0.32
RP11-114O18.1	ENSG00000273406.1	0.32
NARS2	ENSG00000137513.9	0.32
CLVS1	ENSG00000177182.10	0.32
AC073987.1	ENSG00000229209.1	0.32
CTB-181F24.1	ENSG00000254066.1	0.32
ROPN1B	ENSG00000114547.9	0.32
CTB-58E17.1	ENSG00000277969.1	0.32
ABCC8	ENSG00000006071.11	0.31
CXorf40A	ENSG00000197620.10	0.31
UMAD1	ENSG00000219545.9	0.31
RP11-677M14.2	ENSG00000255045.1	0.31
YAE1D1	ENSG00000241127.7	0.31
AC084809.3	ENSG00000236377.1	0.31
AC008074.4	ENSG00000223863.1	0.31
TSPEAR	ENSG00000175894.14	0.31
MLIP	ENSG00000146147.14	0.31
SEPT7P2	ENSG00000214765.8	0.31
AC011995.1	ENSG00000237720.1	0.31
NNT-AS1	ENSG00000248092.7	0.31
NPTXR	ENSG00000221890.2	0.31
AC073283.4	ENSG00000234690.6	0.31
RP1-127B20.4	ENSG00000223730.1	0.31
ZNF815P	ENSG00000235944.7	0.31
PMS2CL	ENSG00000187953.10	0.31
MBOAT4	ENSG00000177669.3	0.31
POLR3GL	ENSG00000121851.12	0.31
TTLL7	ENSG00000137941.16	0.31

## Sheet: Sheet2
Category Term Count % PValue Genes List Total Pop Hits Pop Total Fold Enrichment Bonferroni Benjamini FDR
GOTERM_BP_DIRECT GO:0007218~neuropeptide signaling pathway 4 3.1746031746031744 0.010054930347590935 CYSLTR1, GLRB, TAC1, HCRTR2 75 101 16792 8.867062706270627 0.9734304727153851 1.0 1.0
GOTERM_BP_DIRECT GO:0007268~chemical synaptic transmission 5 3.968253968253968 0.021488310265417823 GRIA2, GLRB, MTNR1B, TAC1, HCRTR2 75 240 16792 4.664444444444444 0.9995896064093663 1.0 1.0
GOTERM_BP_DIRECT GO:0031017~exocrine pancreas development 2 1.5873015873015872 0.03472300456242924 PTF1A, WLS 75 8 16792 55.973333333333336 0.9999969093326423 1.0 1.0
GOTERM_BP_DIRECT GO:0050796~regulation of insulin secretion 3 2.380952380952381 0.035234945131021836 MTNR1B, ABCC8, ICA1 75 67 16792 10.02507462686567 0.9999974452900767 1.0 1.0
GOTERM_BP_DIRECT GO:0007340~acrosome reaction 2 1.5873015873015872 0.06825605517023087 ROPN1B, GLRB 75 16 16792 27.986666666666668 0.9999999999905055 1.0 1.0
GOTERM_BP_DIRECT GO:0033198~response to ATP 2 1.5873015873015872 0.08862787479352587 P2RX6, TRPC3 75 21 16792 21.323174603174603 0.9999999999999966 1.0 1.0

## Sheet: Sheet5
term	count	Pvalue
GO:0007218~neuropeptide signaling pathway	4	0.0100549
GO:0007268~chemical synaptic transmission	5	0.0214883
GO:0031017~exocrine pancreas development	2	0.034723
GO:0050796~regulation of insulin secretion	3	0.0352349				GO:0007218~neuropeptide signaling pathway	GO:0007268~chemical synaptic transmission	GO:0031017~exocrine pancreas development	GO:0050796~regulation of insulin secretion	GO:0007340~acrosome reaction	GO:0033198~response to ATP
GO:0007340~acrosome reaction	2	0.0682561				4	5	2	3	2	2
GO:0033198~response to ATP	2	0.0886279
