# Supplementary material for: Energy stress-induced lncRNA GIRGL modulates glucose metabolism reprogramming through upregulating MCT4 by interacting with YBX1 in lung adenocarcinoma
Source: Research Square preprint supplement (doi:10.21203/rs.3.rs-6423847/v1), 2025-05-14
Supplement: Supplementary file 2 [file 6a4ac9bfc97fe644d55c042f.xlsx]

## Sheet: Sheet1
TableS2: Sequence of siRNAs (5' to 3')
siRNA	sense	anti-sense
si-NC	UUCUCCGAACGUGUCACGUTT	ACGUGACACGUUCGGAGAATT
si1-GIRGL	UCUAACAGGAGAUAAUAGGCU	CCUAUUAUCUCCUGUUAGACA
si2-GIRGL	AGUUAUGACACAAGCAAUCCA	GAUUGCUUGUGUCAUAACUGU
si-YBX1	AACCAUAUCCGUUCCUUACAU	GUAAGGAACGGAUAUGGUUUC
