# Supplementary material for: Energy stress-induced lncRNA GIRGL modulates glucose metabolism reprogramming through upregulating MCT4 by interacting with YBX1 in lung adenocarcinoma
Source: Research Square preprint supplement (doi:10.21203/rs.3.rs-6423847/v1), 2025-05-14
Supplement: Supplementary file 3 [file c8c97c70ed57b157bfb86ae0.xlsx]

## Sheet: Sheet1
TableS3: Primers used for qRT-PCR
Gene	Forward (5'-3')	Reverse (3'-5')
ACTB	CATGTACGTTGCTATCCAGGC	CTCCTTAATGTCACGCACGAT
GIRGL	GCTGGGTCTGGGTTCAGAAA	GGCAGAGGTGTGAGGAACTA
FOXO3	CGGACAAACGGCTCACTCT	GGACCCGCATGAATCGACTAT
GIRGL promoter primer1	ATTTCTCCTTCCCCCAAGCC	AGGAGGAACCCAGGTCACAT
GIRGL promoter primer2	ACTGAGACTTTGCGAGGTGA	CCCGGGTTTGGTAGAGTGAC
GLUT1	GGCCAAGAGTGTGCTAAAGAA	ACAGCGTTGATGCCAGACAG
GLUT3	GCTGGGCATCGTTGTTGGA	GCACTTTGTAGGATAGCAGGAAG
HK1	GCTCTCCGATGAAACTCTCATAG	GGACCTTACGAATGTTGGCAA
HK2	TGCCACCAGACTAAACTAGACG	CCCGTGCCCACAATGAGAC
PGI	CAAGGACCGCTTCAACCACTT	CCAGGATGGGTGTGTTTGACC
PFK1	GGTGCCCGTGTCTTCTTTGT	AAGCATCATCGAAACGCTCTC
ALDOA	ATGCCCTACCAATATCCAGCA	GCTCCCAGTGGACTCATCTG
GAPDH	ACAACTTTGGTATCGTGGAAGG	GCCATCACGCCACAGTTTC
PGK1	TGGACGTTAAAGGGAAGCGG	GCTCATAAGGACTACCGACTTGG
PGAM1	GTGCAGAAGAGAGCGATCCG	CGGTTAGACCCCCATAGTGC
ENO1	AAAGCTGGTGCCGTTGAGAA	GGTTGTGGTAAACCTCTGCTC
PKM	AGGGCACTGGGCTGTTGTTC	TGAGTGGAGGGTGGGGACAG
LDHA	TCCGGATCTCATTGCCACGC	GCCATGCCAACAGCACCAAC
MCT4	AGGTATCCTTGAGACGGTCAG	CAAGCAGGTTAGTGATGCCG
U6	GCTTCGGCAGCACATATACTAAAAT	CGCTTCACGAATTTGCGTGTCAT
18S	AGGCGCGCAAATTACCCAATCC	GCCCTCCAATTGTTCCTCGTTAAG
YBX1	GGGGACAAGAAGGTCATCGC	CGAAGGTACTTCCTGGGGTTA
MCT4 promoter primer1	CAGCCTAGCCAACATGGTGA	ACCCAGGTTTAGAGGGCCTA
MCT4 promoter primer2	TATACTTGTGCCGGGCATGG	GGAGGAAGGATCAGGTTGCT
